# Supplementary material for: Rapid Identification by Resequencing-Based QTL Mapping of a Novel Allele RGA1-FH Decreasing Grain Length in a Rice Restorer Line ‘Fuhui212’
Source: MDPI journal article supplement (doi:10.3390/ijms241310746), 2023-06-28
Supplement: s1 [file s1]

## Supplementary Files

**Figure S1. Distribution of variant markers used for QTL mapping.** Grey bars represent putative centromeres.

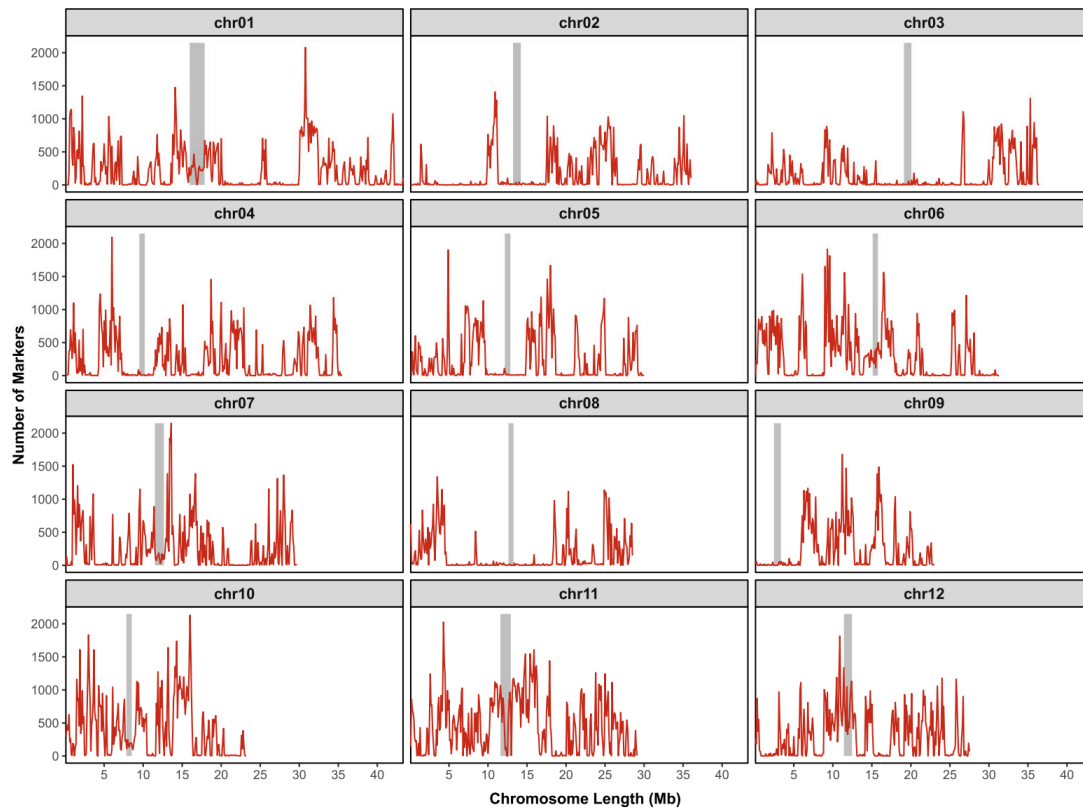

**Figure S2. Distribution of LOD scores from QTL mapping.** Red dashed line:  $p < 0.05$ ; blue dashed line:  $p < 0.01$ .

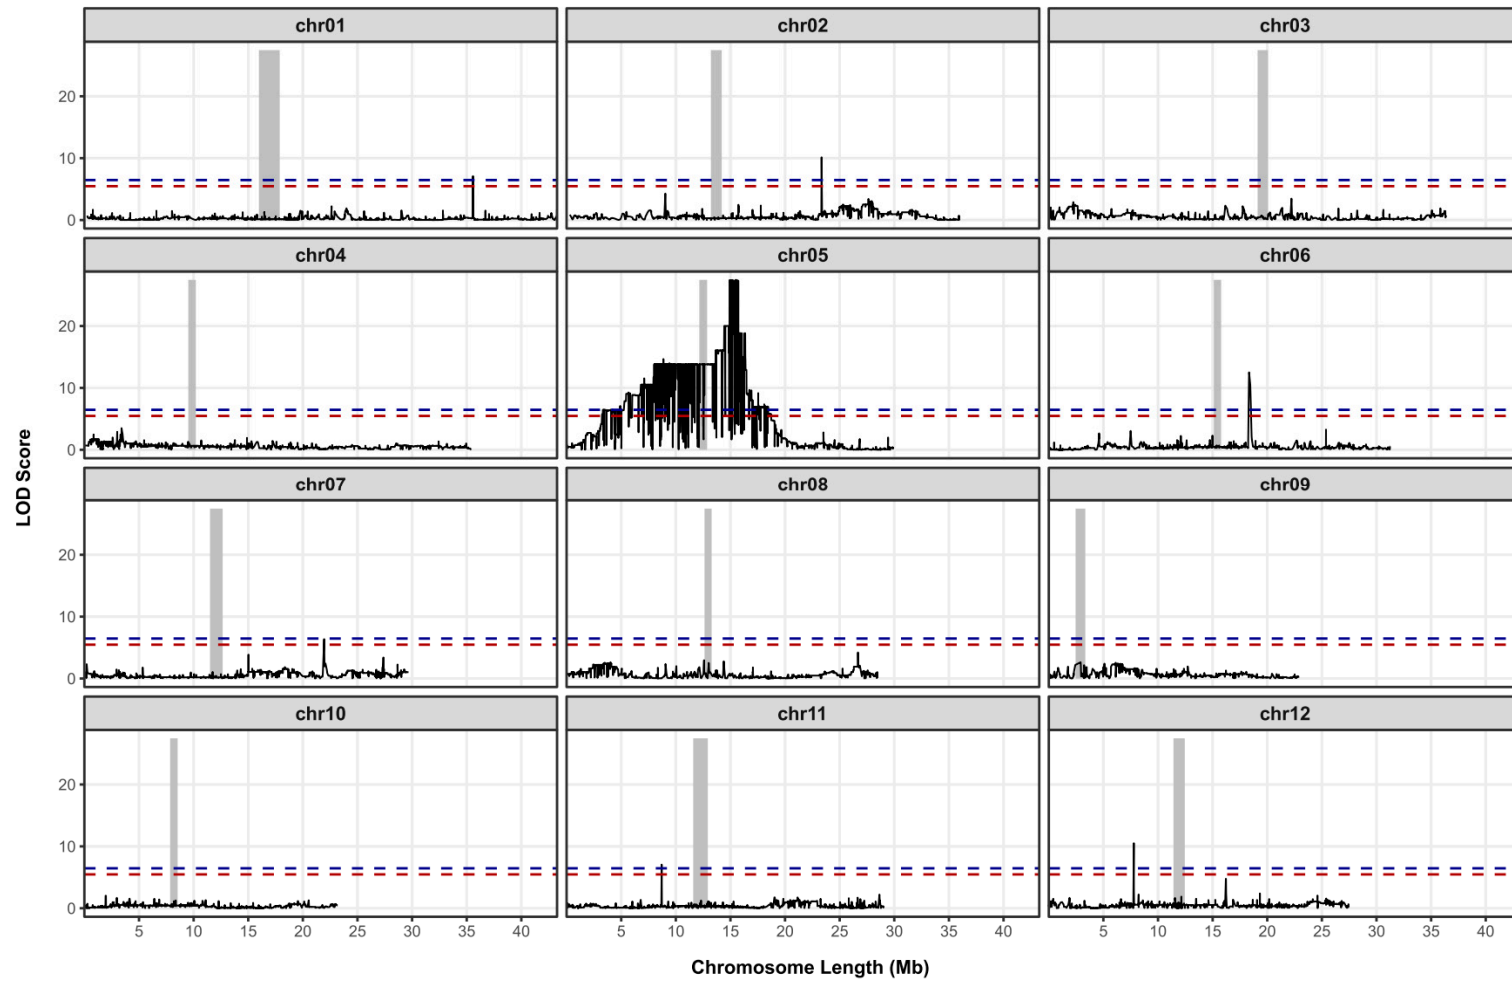

**Figure S3. Predicted effects of 4,851 co-segregated variants within chromosome 5 region.** Variant numbers for each category are given in parentheses.

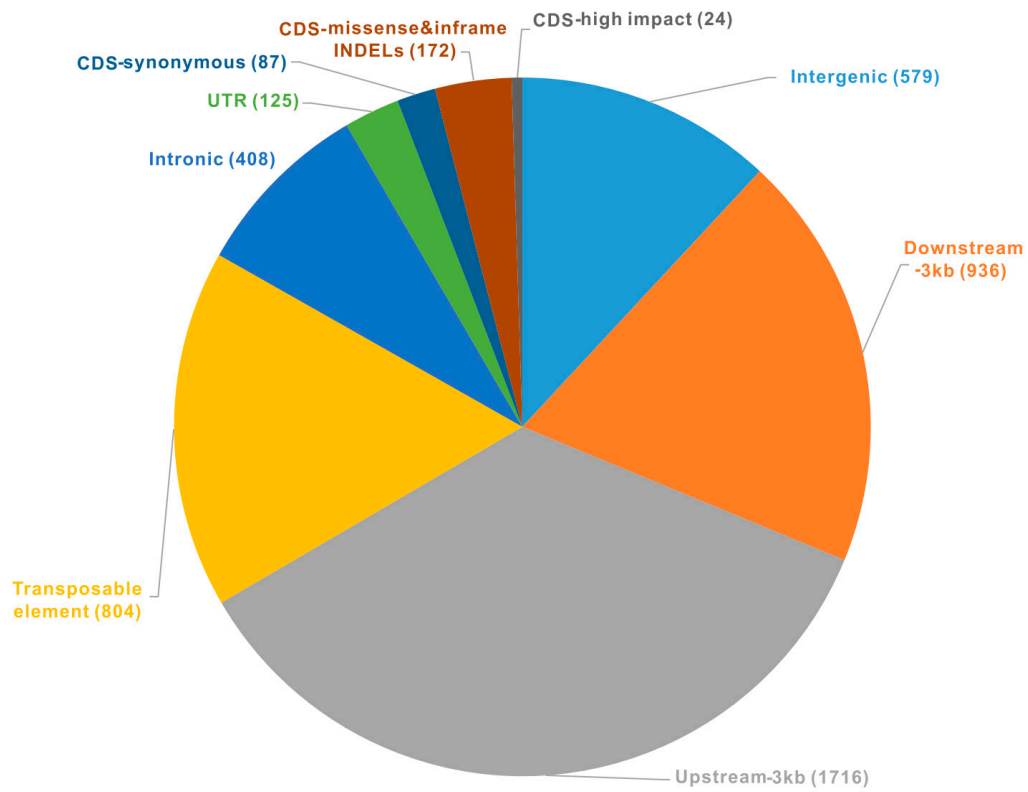

**Figure S4. Comparing of encoded proteins of three *RGA1* alleles.**

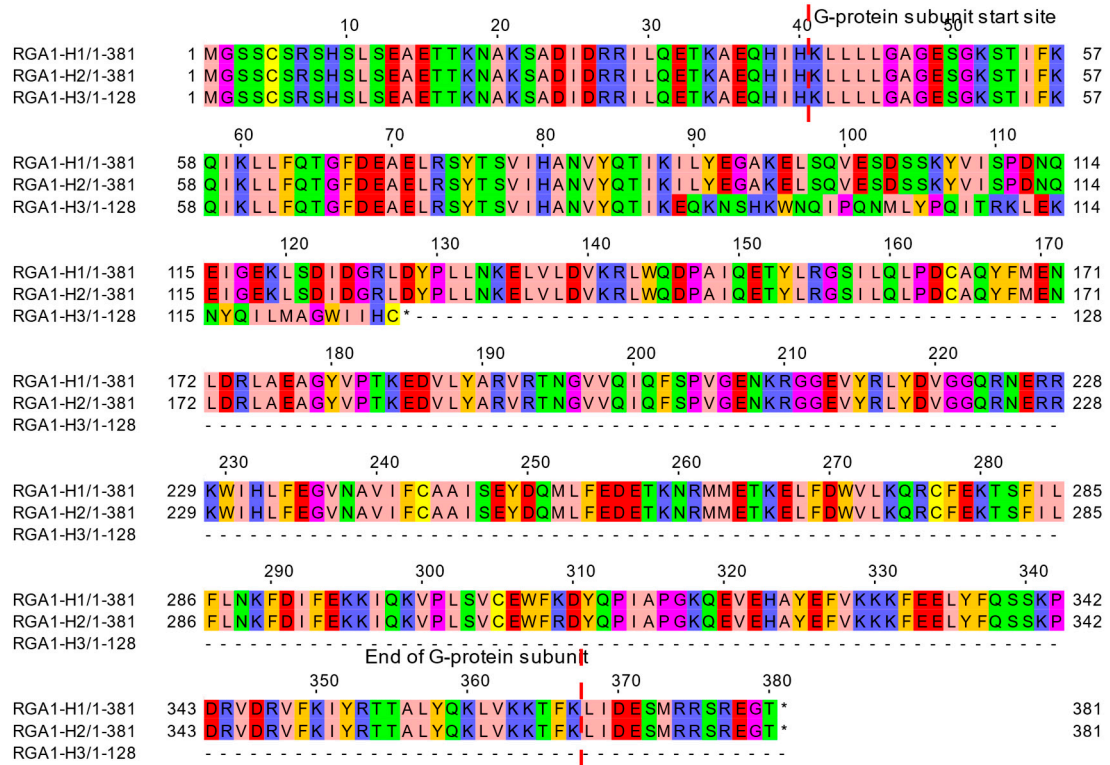

\* *RGA1*-H1 and *RGA1*-H2 correspond to haplotype in Figure 2e, respectively. *RGA1*-H3 represents the predicted protein sequence of *RGA1*-FH.

Figure S5. Comparing cDNA Sequences of *RGAI* between Large and Small Grains in F2 Population.

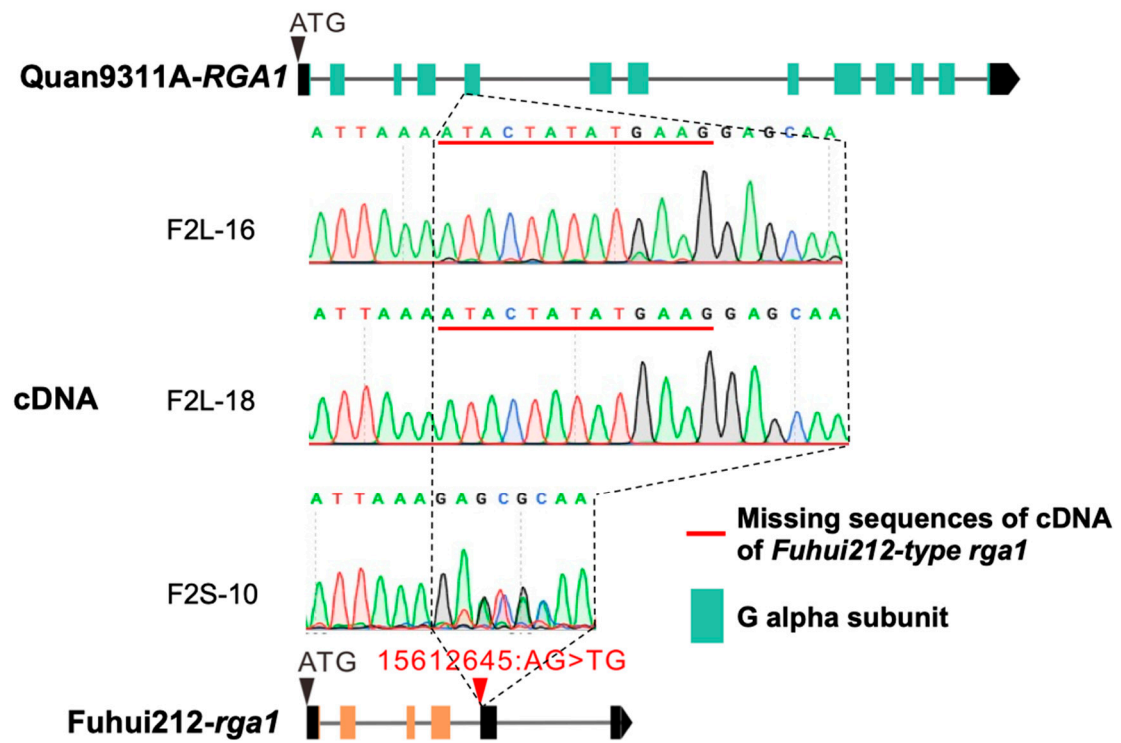

Figure S6. Expression verification of *RGA1* in transgenic lines

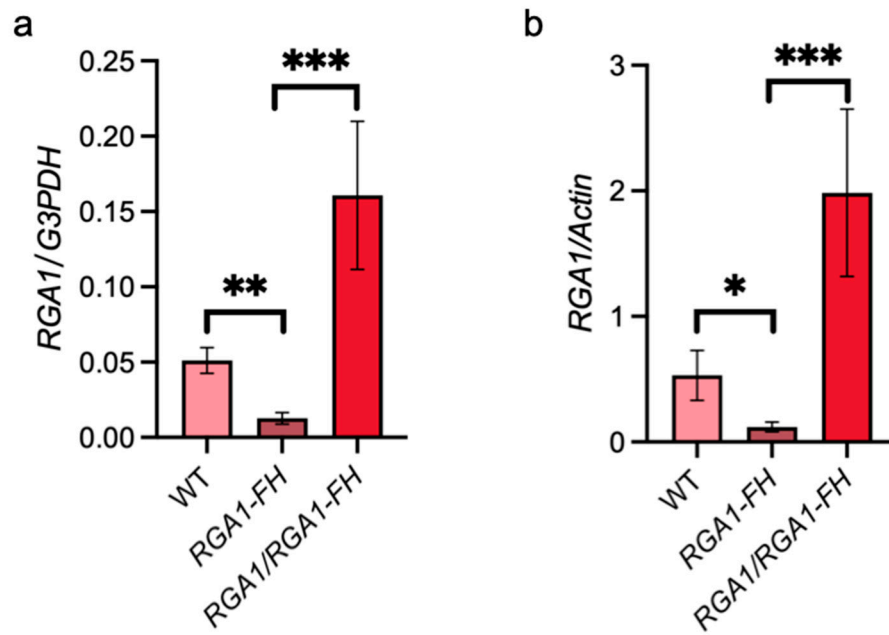

Relative expression levels of *RGA1* in large grain individuals (WT), small grains individuals (*RGA1-FH*) and transgenic lines (*RGA1/RGA1-FH*) which compared to internal reference genes *G3PDH* (a) and *Actin* (b). Statistic tests using Welch's t-test, \*P < 0.05, \*\*P < 0.01, \*\*\*P < 0.001.

**Table S1. Information of primers in this study.**

| Primer name | Forward primer (5' to 3')                               | Reverse primer (5' to 3')                 | Expect Size<br>(bp) | Aims                                                         |
|-------------|---------------------------------------------------------|-------------------------------------------|---------------------|--------------------------------------------------------------|
| RGA1-CDS    | ATGGGCTCATCCTGTAGCA                                     | AAGTTCCTTCCCTGGA                          | 1143 bp             | <i>OsRGA1</i> CDS cloning                                    |
| RGA1-comp   | GGCGCGCCCAGGGT <sup>*</sup> TGGGAGTGTGAT <sup>*</sup> T | GGCGCGCCCGGTGGACCAGGTA <sup>*</sup> ACTAC | 7063 bp             | <i>OsRGA1</i> complete sequence cloning                      |
| RGA1-qPCR-1 | <i>GAACTCTCACAAGTGGAATC</i>                             | <i>CCAACCTGCCATCAATATC</i>                | 97 bp               | <i>OsRGA1</i> expression identification                      |
| RGA1-qPCR-3 | <i>TGATGAGGCAGAACTTAGG</i>                              | <i>CCAACCTGCCATCAATATC</i>                | 182 bp              | <i>OsRGA1</i> expression identification                      |
| G3PDH-qPCR  | <i>CATCATTCCCAGCAGCAC</i>                               | <i>GCAGCCTTCTCGATTCTAAC</i>               | 144 bp              | <i>qPCR</i> primers of internal reference genes <i>G3PDH</i> |
| Actin-qPCR  | <i>TGTATGCCAGTGGTCGTACCA</i>                            | <i>CCAGCAAGGTCGAGACGAA</i>                | 121 bp              | <i>qPCR</i> primers of internal reference genes <i>Actin</i> |

Note: AscI restriction sites are indicated in italics.

**Table S2. Measured grain traits of F2 population.**

| <b>Sample ID</b> | <b>1000 GW (g)</b> | <b>Grain length mean (mm)</b> | <b>Grain length SD</b> | <b>Grain width mean (mm)</b> | <b>Grain width SD</b> |
|------------------|--------------------|-------------------------------|------------------------|------------------------------|-----------------------|
| F2L-1            | 25.525             | 9.522                         | 0.422                  | 2.515                        | 0.201                 |
| F2L-2            | 25.602             | 8.898                         | 0.486                  | 2.667                        | 0.230                 |
| F2L-3            | 27.261             | 9.179                         | 0.437                  | 2.636                        | 0.189                 |
| F2L-4            | 26.331             | 9.057                         | 0.476                  | 2.767                        | 0.228                 |
| F2L-5            | 24.368             | 9.040                         | 0.567                  | 2.485                        | 0.219                 |
| F2L-6            | 26.248             | 9.411                         | 1.058                  | 2.522                        | 0.229                 |
| F2L-7            | 27.452             | 9.612                         | 0.427                  | 2.585                        | 0.184                 |
| F2L-8            | 24.161             | 9.080                         | 0.357                  | 2.453                        | 0.221                 |
| F2L-9            | 28.432             | 9.537                         | 0.478                  | 2.663                        | 0.193                 |
| F2L-10           | 23.839             | 8.847                         | 0.432                  | 2.544                        | 0.244                 |
| F2L-11           | 25.475             | 8.830                         | 0.434                  | 2.548                        | 0.195                 |
| F2L-12           | 29.235             | 9.567                         | 0.442                  | 2.734                        | 0.228                 |
| F2L-13           | 25.880             | 9.217                         | 0.619                  | 2.665                        | 0.238                 |
| F2L-14           | 23.374             | 8.963                         | 0.434                  | 2.576                        | 0.192                 |
| F2L-15           | 26.825             | 9.310                         | 0.407                  | 2.607                        | 0.224                 |
| F2L-16           | 24.167             | 8.889                         | 0.608                  | 2.601                        | 0.205                 |
| F2L-17           | 26.218             | 9.021                         | 0.465                  | 2.626                        | 0.216                 |
| F2L-18           | 21.726             | 8.632                         | 0.376                  | 2.578                        | 0.188                 |
| F2L-19           | 27.879             | 9.273                         | 0.515                  | 2.612                        | 0.226                 |
| F2L-20           | 25.244             | 8.806                         | 0.436                  | 2.642                        | 0.208                 |
| F2L-21           | 24.412             | 8.990                         | 0.464                  | 2.505                        | 0.239                 |
| F2L-22           | 24.750             | 8.952                         | 0.504                  | 2.512                        | 0.220                 |
| F2L-23           | 25.217             | 8.978                         | 0.536                  | 2.616                        | 0.266                 |
| F2L-24           | 26.303             | 9.109                         | 0.403                  | 2.519                        | 0.222                 |
| F2L-25           | 26.681             | 9.161                         | 0.397                  | 2.661                        | 0.228                 |
| F2L-26           | 24.139             | 8.920                         | 0.546                  | 2.477                        | 0.252                 |
| F2L-27           | 26.793             | 9.357                         | 0.330                  | 2.693                        | 0.209                 |
| F2L-28           | 26.209             | 9.048                         | 0.574                  | 2.675                        | 0.456                 |
| F2L-29           | 25.740             | 8.859                         | 0.425                  | 2.659                        | 0.254                 |
| F2L-30           | 24.263             | 8.633                         | 0.466                  | 2.574                        | 0.203                 |
| F2L-31           | 26.521             | 9.535                         | 0.701                  | 2.634                        | 0.221                 |
| F2L-32           | 24.873             | 9.098                         | 0.367                  | 2.512                        | 0.219                 |
| F2S-1            | 11.333             | 6.337                         | 0.959                  | 2.701                        | 0.470                 |
| F2S-2            | 15.077             | 6.235                         | 0.438                  | 2.820                        | 0.202                 |
| F2S-3            | 13.846             | 6.214                         | 0.379                  | 2.687                        | 0.203                 |
| F2S-4            | 13.500             | 6.085                         | 0.370                  | 2.730                        | 0.167                 |
| F2S-5            | 13.000             | 6.098                         | 0.960                  | 2.853                        | 0.494                 |
| F2S-6            | 12.642             | 6.209                         | 0.337                  | 2.613                        | 0.212                 |
| F2S-7            | 15.824             | 6.199                         | 0.377                  | 2.802                        | 0.184                 |
| F2S-8            | 13.836             | 6.004                         | 0.453                  | 2.686                        | 0.211                 |
| F2S-9            | 15.672             | 6.733                         | 0.363                  | 2.828                        | 0.207                 |



|        |        |       |       |       |       |
|--------|--------|-------|-------|-------|-------|
| F2S-10 | 12.139 | 6.448 | 0.387 | 2.747 | 0.170 |
| F2S-11 | 14.932 | 6.092 | 0.371 | 2.755 | 0.195 |
| F2S-12 | 13.788 | 6.198 | 0.376 | 2.756 | 0.210 |
| F2S-13 | 13.894 | 5.978 | 0.410 | 2.520 | 0.168 |
| F2S-14 | 15.839 | 6.195 | 0.502 | 2.749 | 0.191 |
| F2S-15 | 17.661 | 6.687 | 0.480 | 2.844 | 0.209 |
| F2S-16 | 14.589 | 6.417 | 0.361 | 2.783 | 0.172 |
| F2S-17 | 14.185 | 6.382 | 0.520 | 2.793 | 0.185 |
| F2S-18 | 13.579 | 5.783 | 0.478 | 2.708 | 0.227 |
| F2S-19 | 14.333 | 6.310 | 0.405 | 2.761 | 0.223 |
| F2S-20 | 14.877 | 6.118 | 0.384 | 2.717 | 0.151 |
| F2S-21 | 15.473 | 6.302 | 0.382 | 2.803 | 0.205 |

---

**Table S3. Sequencing, mapping metrics and genotyping RGA1 of F2 samples.**

| Sample ID | Trait group | No. of<br>read<br>pairs | Clean<br>data size<br>(G) | Sequencing<br>depth | Mean mapped<br>depth with<br>mapping<br>quality $\geq 20$ | RGA1<br>haplotype |
|-----------|-------------|-------------------------|---------------------------|---------------------|-----------------------------------------------------------|-------------------|
| F2L-1     | Large grain | 57657939                | 17.3                      | 46.4                | 35.03                                                     | H2/H3             |
| F2L-10    | Large grain | 58614491                | 17.6                      | 47.1                | 35.23                                                     | H2                |
| F2L-11    | Large grain | 57702920                | 17.3                      | 46.4                | 35.63                                                     | H2                |
| F2L-12    | Large grain | 54391042                | 16.3                      | 43.7                | 33.81                                                     | H2/H3             |
| F2L-13    | Large grain | 53999433                | 16.2                      | 43.4                | 33.09                                                     | H2/H3             |
| F2L-14    | Large grain | 56993301                | 17.1                      | 45.8                | 35.14                                                     | H2                |
| F2L-16    | Large grain | 62172588                | 18.7                      | 50.0                | 38.15                                                     | H2/H3             |
| F2L-17    | Large grain | 57201807                | 17.2                      | 46.0                | 33.97                                                     | H2                |
| F2L-18    | Large grain | 55871400                | 16.8                      | 44.9                | 34.1                                                      | H2                |
| F2L-19    | Large grain | 61283267                | 18.4                      | 49.3                | 37.7                                                      | H2/H3             |
| F2L-2     | Large grain | 63098655                | 18.9                      | 50.7                | 38                                                        | H2/H3             |
| F2L-20    | Large grain | 43539341                | 13.1                      | 35.0                | 26.77                                                     | H2/H3             |
| F2L-21    | Large grain | 55954402                | 16.8                      | 45.0                | 33.97                                                     | H2                |
| F2L-22    | Large grain | 58597061                | 17.6                      | 47.1                | 35.71                                                     | H2/H3             |
| F2L-23    | Large grain | 57092258                | 17.1                      | 45.9                | 34.73                                                     | H2/H3             |
| F2L-24    | Large grain | 51529133                | 15.5                      | 41.4                | 31.66                                                     | H2                |
| F2L-25    | Large grain | 65178812                | 19.6                      | 52.4                | 39.77                                                     | H2/H3             |
| F2L-26    | Large grain | 56021263                | 16.8                      | 45.1                | 33.93                                                     | H2/H3             |
| F2L-28    | Large grain | 42267508                | 12.7                      | 34.0                | 25.66                                                     | H2                |
| F2L-29    | Large grain | 61624639                | 18.5                      | 49.6                | 37.89                                                     | H2                |
| F2L-3     | Large grain | 52334217                | 15.7                      | 42.1                | 32.17                                                     | H2/H3             |
| F2L-30    | Large grain | 58703876                | 17.6                      | 47.2                | 35.93                                                     | H2                |
| F2L-31    | Large grain | 56710866                | 17.0                      | 45.6                | 33.84                                                     | H2/H3             |
| F2L-32    | Large grain | 68316360                | 20.5                      | 54.9                | 40.19                                                     | H2/H3             |
| F2L-4     | Large grain | 58237488                | 17.5                      | 46.8                | 35.38                                                     | H2                |
| F2L-5     | Large grain | 58424718                | 17.5                      | 47.0                | 35.79                                                     | H2/H3             |
| F2L-6     | Large grain | 50325592                | 15.1                      | 40.5                | 30.53                                                     | H2/H3             |
| F2L-7     | Large grain | 58604420                | 17.6                      | 47.1                | 35.48                                                     | H2/H3             |
| F2L-8     | Large grain | 62313010                | 18.7                      | 50.1                | 38.26                                                     | H2/H3             |
| F2L-9     | Large grain | 56874861                | 17.1                      | 45.7                | 34.86                                                     | H2/H3             |
| F2S-1     | Small grain | 54571081                | 16.4                      | 43.9                | 33.53                                                     | H3                |
| F2S-10    | Small grain | 53118373                | 15.9                      | 42.7                | 32.51                                                     | H3                |
| F2S-12    | Small grain | 58143745                | 17.4                      | 46.8                | 35.69                                                     | H3                |
| F2S-13    | Small grain | 59612797                | 17.9                      | 47.9                | 36.57                                                     | H3                |
| F2S-14    | Small grain | 56172082                | 16.9                      | 45.2                | 34.14                                                     | H3                |
| F2S-15    | Small grain | 48883846                | 14.7                      | 39.3                | 30.07                                                     | H3                |
| F2S-16    | Small grain | 47696234                | 14.3                      | 38.4                | 29.03                                                     | H3                |
| F2S-17    | Small grain | 41235410                | 12.4                      | 33.2                | 25.27                                                     | H3                |
| F2S-18    | Small grain | 32980167                | 9.9                       | 26.5                | 20.22                                                     | H3                |

|        |             |          |      |      |       |    |
|--------|-------------|----------|------|------|-------|----|
| F2S-19 | Small grain | 47808781 | 14.3 | 38.5 | 29.08 | H3 |
| F2S-2  | Small grain | 44714216 | 13.4 | 36.0 | 27.38 | H3 |
| F2S-20 | Small grain | 36730908 | 11.0 | 29.5 | 22.45 | H3 |
| F2S-21 | Small grain | 43223715 | 13.0 | 34.8 | 26.63 | H3 |
| F2S-4  | Small grain | 43061393 | 12.9 | 34.6 | 26.49 | H3 |
| F2S-5  | Small grain | 50031634 | 15.0 | 40.2 | 30.76 | H3 |
| F2S-6  | Small grain | 44033012 | 13.2 | 35.4 | 27.03 | H3 |
| F2S-7  | Small grain | 55073111 | 16.5 | 44.3 | 33.8  | H3 |
| F2S-8  | Small grain | 56110773 | 16.8 | 45.1 | 34.22 | H3 |
| F2S-9  | Small grain | 39164045 | 11.7 | 31.5 | 24.04 | H3 |

Note: The RGA1 haplotype number in this table corresponds to the number in Figure 2e and Figure S4.

**Table S4. Candidate QTL regions with genome-scan-adjusted p-value  $\leq 0.05$ .**

| <b>Candidate QTL region</b> | <b>Genome-scan-adjusted p-values</b> | <b>No. of non-TE protein-coding genes</b> | <b>No. of TEs</b> |
|-----------------------------|--------------------------------------|-------------------------------------------|-------------------|
| chr01:35574787-35574913     | 0.01                                 | 0                                         | 1                 |
| chr02:23341009-23341034     | 0.01                                 | 0                                         | 1                 |
| chr05:3136610-3370587       | 0.01                                 | 30                                        | 2                 |
| chr05:3427622-3430304       | 0.01                                 | 1                                         | 0                 |
| chr05:3432976-3633726       | 0.01                                 | 24                                        | 5                 |
| chr05:3651690-4094550       | 0.01                                 | 39                                        | 18                |
| chr05:4114609-4349880       | 0.01                                 | 28                                        | 8                 |
| chr05:4404085-4411800       | 0.05                                 | 1                                         | 0                 |
| chr05:4538528-4726058       | 0.05                                 | 29                                        | 4                 |
| chr05:4749657-4850242       | 0.01                                 | 10                                        | 3                 |
| chr05:4853242-4913532       | 0.01                                 | 7                                         | 2                 |
| chr05:4914327-5010193       | 0.05                                 | 11                                        | 4                 |
| chr05:5031176-5659773       | 0.01                                 | 58                                        | 27                |
| chr05:5780174-5833311       | 0.01                                 | 5                                         | 2                 |
| chr05:6014588-6579257       | 0.01                                 | 55                                        | 17                |
| chr05:6604425-6857523       | 0.01                                 | 26                                        | 5                 |
| chr05:6858559-7045765       | 0.01                                 | 25                                        | 5                 |
| chr05:7048430-7093295       | 0.01                                 | 4                                         | 3                 |
| chr05:7098163-7098670       | 0.01                                 | 0                                         | 1                 |
| chr05:7104594-7361033       | 0.01                                 | 28                                        | 15                |
| chr05:7363012-7485970       | 0.01                                 | 14                                        | 6                 |
| chr05:7491796-7539272       | 0.01                                 | 6                                         | 2                 |
| chr05:7547808-7717831       | 0.01                                 | 20                                        | 9                 |
| chr05:7747060-7857515       | 0.01                                 | 8                                         | 5                 |
| chr05:7879296-8052834       | 0.01                                 | 17                                        | 3                 |
| chr05:8058277-8145611       | 0.01                                 | 3                                         | 9                 |
| chr05:8147890-8217467       | 0.01                                 | 4                                         | 3                 |
| chr05:8218083-8326024       | 0.01                                 | 4                                         | 3                 |
| chr05:8326080-8342705       | 0.01                                 | 0                                         | 6                 |
| chr05:8344315-8559766       | 0.01                                 | 26                                        | 9                 |
| chr05:8563749-8618865       | 0.01                                 | 8                                         | 3                 |
| chr05:8642802-8748611       | 0.01                                 | 8                                         | 14                |
| chr05:8750587-8790219       | 0.01                                 | 3                                         | 2                 |
| chr05:8805394-8898520       | 0.01                                 | 11                                        | 10                |
| chr05:8898631-8986295       | 0.01                                 | 10                                        | 5                 |
| chr05:8987062-9016810       | 0.01                                 | 0                                         | 4                 |
| chr05:9017321-9025611       | 0.01                                 | 0                                         | 1                 |
| chr05:9031022-9082678       | 0.01                                 | 5                                         | 4                 |
| chr05:9093782-9155626       | 0.01                                 | 8                                         | 2                 |
| chr05:9155823-9173692       | 0.01                                 | 0                                         | 1                 |
| chr05:9174012-9271024       | 0.01                                 | 8                                         | 8                 |

|                         |      |    |    |
|-------------------------|------|----|----|
| chr05:9278542-9284344   | 0.01 | 0  | 1  |
| chr05:9287402-9352329   | 0.01 | 5  | 4  |
| chr05:9352555-9402169   | 0.01 | 2  | 9  |
| chr05:9404908-9712988   | 0.01 | 15 | 24 |
| chr05:9727512-9850576   | 0.01 | 0  | 16 |
| chr05:9870454-10248106  | 0.01 | 7  | 45 |
| chr05:10271884-10380858 | 0.01 | 1  | 19 |
| chr05:10415168-10498548 | 0.01 | 2  | 12 |
| chr05:10522625-10604640 | 0.01 | 3  | 8  |
| chr05:10637981-10700110 | 0.01 | 1  | 7  |
| chr05:10715009-10888556 | 0.01 | 11 | 10 |
| chr05:10898822-11093856 | 0.01 | 17 | 18 |
| chr05:11114459-11132016 | 0.01 | 1  | 3  |
| chr05:11144744-11449899 | 0.01 | 16 | 27 |
| chr05:11470302-11559460 | 0.01 | 2  | 13 |
| chr05:11571204-11727079 | 0.01 | 11 | 9  |
| chr05:11746062-11962128 | 0.01 | 5  | 24 |
| chr05:11971983-12006893 | 0.01 | 1  | 6  |
| chr05:12018749-12052743 | 0.01 | 0  | 5  |
| chr05:12092644-12100404 | 0.01 | 0  | 1  |
| chr05:12118021-12497492 | 0.01 | 7  | 49 |
| chr05:12573832-13365487 | 0.01 | 45 | 69 |
| chr05:13392800-13529365 | 0.01 | 11 | 4  |
| chr05:13555489-13691964 | 0.01 | 8  | 8  |
| chr05:13715502-14229265 | 0.01 | 30 | 43 |
| chr05:14235366-14533368 | 0.01 | 22 | 24 |
| chr05:14534415-14888616 | 0.01 | 32 | 18 |
| chr05:14891737-15097388 | 0.01 | 29 | 7  |
| chr05:15103962-15127504 | 0.01 | 1  | 2  |
| chr05:15135688-15199495 | 0.01 | 5  | 5  |
| chr05:15200689-15291916 | 0.01 | 8  | 11 |
| chr05:15299461-15326111 | 0.01 | 0  | 5  |
| chr05:15412316-15544309 | 0.01 | 10 | 19 |
| chr05:15552453-15623176 | 0.01 | 8  | 1  |
| chr05:15631320-15664177 | 0.01 | 3  | 0  |
| chr05:15665600-15730949 | 0.01 | 5  | 3  |
| chr05:15741489-15788795 | 0.01 | 4  | 1  |
| chr05:15790840-15838685 | 0.01 | 2  | 7  |
| chr05:15839181-15955285 | 0.01 | 8  | 11 |
| chr05:15990607-16052045 | 0.01 | 8  | 2  |
| chr05:16134727-16221709 | 0.01 | 8  | 4  |
| chr05:16255129-16985735 | 0.01 | 73 | 28 |
| chr05:17012997-17048563 | 0.01 | 3  | 0  |
| chr05:17068183-17223434 | 0.01 | 11 | 14 |

|                         |      |    |    |
|-------------------------|------|----|----|
| chr05:17240604-17283869 | 0.01 | 5  | 3  |
| chr05:17300992-17370442 | 0.01 | 10 | 1  |
| chr05:17418272-17745617 | 0.01 | 35 | 18 |
| chr05:17748559-18118031 | 0.01 | 44 | 7  |
| chr05:18149518-18278547 | 0.01 | 12 | 8  |
| chr05:18290380-18326426 | 0.01 | 4  | 2  |
| chr05:18332912-18377736 | 0.01 | 5  | 2  |
| chr05:18381927-18401602 | 0.01 | 1  | 3  |
| chr05:18404421-18766176 | 0.01 | 39 | 14 |
| chr06:18326998-18447401 | 0.01 | 1  | 23 |
| chr07:21947959-21948528 | 0.05 | 0  | 1  |
| chr12:7785337-7786706   | 0.01 | 0  | 1  |

---

**Table S5. Genes with large impact variants segregated between large grain and small grain plants.** Effects predicted based on MSU v7 annotations.

| Locus ID       | Gene description  | CDS change                       | Variant position in CDS | Predicted effect   | Predicted malfunctional genotype |
|----------------|-------------------|----------------------------------|-------------------------|--------------------|----------------------------------|
| LOC_Os05g25670 | expressed protein | T>C                              | 298                     | stop lost          | Quan9311A                        |
| LOC_Os05g25760 | expressed protein | C>T                              | 316                     | stop gained        | Quan9311A                        |
|                |                   | G>A                              | 533                     | stop gained        | Quan9311A                        |
| LOC_Os05g25830 | expressed protein | INS: GAACAGAGAGAAGCACAGGGGA      | 1090                    | frameshift variant | Quan9311A                        |
|                |                   | C>T                              | 712                     | stop gained        | Quan9311A                        |
|                |                   | DEL: G                           | 247                     | frameshift variant | Quan9311A                        |
|                |                   | C>T                              | 157                     | stop gained        | Quan9311A                        |
| LOC_Os05g25890 | expressed protein | INS: TGGT                        | 832                     | frameshift variant | Quan9311A                        |
| LOC_Os05g25930 | expressed protein | DEL: A                           | 351                     | frameshift variant | Quan9311A                        |
| LOC_Os05g25990 | expressed protein | DEL: G                           | 720                     | frameshift variant | Fuhui212                         |
|                |                   | DEL:<br>AGGCGGTGGACGCGGCGAGGAGGG | 677                     | frameshift variant | Quan9311A                        |
|                |                   | C<br>C>T                         | 340                     | stop gained        | Quan9311A                        |

|                |                                                                                                                         |                                   |      |                            |           |
|----------------|-------------------------------------------------------------------------------------------------------------------------|-----------------------------------|------|----------------------------|-----------|
| LOC_Os05g26040 | pumilio-family<br>RNA binding<br>repeat containing<br>protein, expressed                                                | DEL: ACCGCCCCACCACGGGAGA          | 213  | frameshift<br>variant      | Quan9311A |
|                |                                                                                                                         | DEL: AA                           | 1706 | frameshift<br>variant      | Quan9311A |
|                |                                                                                                                         | DEL: G                            | 3829 | frameshift<br>variant      | Quan9311A |
| LOC_Os05g26070 | cyclin, putative,<br>expressed                                                                                          | A>G                               | 1    | start lost                 | Quan9311A |
| LOC_Os05g26210 | ATOF17/OFP1,<br>putative, expressed                                                                                     | DEL: TTAG                         | 698  | frameshift<br>variant      | Quan9311A |
| LOC_Os05g26850 | hypothetical<br>protein                                                                                                 | INS:<br>TTGAAACGTAAAGACAGATGGAGAT | 142  | frameshift<br>variant      | Quan9311A |
|                |                                                                                                                         | ATTG                              |      |                            |           |
|                |                                                                                                                         | C>T                               | 94   | stop gained                | Fuhui212  |
| LOC_Os05g26860 | expressed protein                                                                                                       | DEL: A                            | 519  | frameshift<br>variant      | Quan9311A |
| LOC_Os05g26870 | CAMK_KIN1/SN<br>F1/Nim1_like.21 -<br>CAMK includes<br>calcium/calmoduli<br>n dependent<br>protein kinases,<br>expressed | DEL: TCTC                         | 153  | frameshift<br>variant      | Quan9311A |
|                |                                                                                                                         | INS: TATC                         | 129  | frameshift<br>variant      | Quan9311A |
| LOC_Os05g26890 | D1/RGA1, G-<br>protein alpha                                                                                            | A>T                               | 154* | splice acceptor<br>variant | Fuhui212  |



|                |                                 |        |     |                       |          |
|----------------|---------------------------------|--------|-----|-----------------------|----------|
|                | subunit, putative,<br>expressed |        |     |                       |          |
| LOC_Os05g26980 | expressed protein               | DEL: G | 108 | frameshift<br>variant | Fuhui212 |

\*position refers to the start position of intron adjacent to exon (i.e., 153bp coding + 1bp intron)

**Table S6 Phenotypic statistics of grains of wild-type F2L-30, *RGAI-FH* type F2S-16 and the complemental lines.**

|                           | WT            | <i>RGAI-FH</i> | <i>RGAI/RGAI-FH</i> |
|---------------------------|---------------|----------------|---------------------|
| Thousand Grain weight (g) | 19.930        | 15.819         | 17.732              |
| Mean length/width         | 3.492         | 2.433          | 3.478               |
| Mean length ( ± SD) (mm)  | 8.865 ± 0.822 | 6.802 ± 0.693  | 8.885 ± 0.898       |
| Mean width ( ± SD) (mm)   | 2.589 ± 0.295 | 2.840 ± 0.305  | 2.604 ± 0.328       |
| Diameter (mm)             | 4.849         | 4.379          | 4.844               |
| Mean roundness            | 0.297         | 0.428          | 0.298               |
